# Supplementary material for: Non-rare-earth-doped submicron-grade narrow-band red phosphors for W-LED as well as FED and enhanced Bi3+-doped blue light absorption
Source: Royal Society of Chemistry journal article supplement (doi:10.1039/d2tc03566a), 2023-01-01
Supplement: d2tc03566a1.pdf [file d2tc03566a1.pdf]

# Non-rare-earth-doped sub-micron-grade narrow-band red phosphors for W-LED as well as FED and enhanced Bi<sup>3+</sup>-doped blue light absorption

Yuhan Zhou<sup>a</sup>, Hang Chen<sup>a</sup>, Yuhua Wang<sup>a\*</sup>

\*Corresponding author: Yuhua Wang, Ph. D, Professor.

Tel: +86-931-8912772; Fax: +86-931-8913554

E-mail address: wyh@lzu.edu.cn.

<sup>a</sup>School of Materials and Energy, National and Local Joint Engineering Laboratory for Optical Conversion Materials and Technology of National Development and Reform Commission, Lanzhou University, Lanzhou 730000, P. R. China

Table. S1 Radius of the cations of host

| Cation           | Coordination number | Radius(Å) |
|------------------|---------------------|-----------|
| Sr <sup>2+</sup> | 6                   | 1.18      |
| Ge <sup>4+</sup> | 4                   | 0.39      |
|                  | 6                   | 0.53      |
| Bi <sup>3+</sup> | 6                   | 1.03      |
| Mn <sup>4+</sup> | 4                   | 0.39      |
|                  | 6                   | 0.53      |

Table. S2 Radius difference between cations and doped ions

| Cation               | Doped ion            | Dr    |
|----------------------|----------------------|-------|
| Sr <sup>2+</sup> (6) | Bi <sup>3+</sup> (6) | 12.7  |
|                      | Mn <sup>4+</sup> (6) | 55.1  |
| Ge <sup>4+</sup> (4) | Mn <sup>4+</sup> (4) | 0     |
| Ge <sup>4+</sup> (6) | Bi <sup>3+</sup> (6) | -94.3 |
|                      | Mn <sup>4+</sup> (6) | 0     |

Table. S3 The residual factors ( $R_p$ ,  $R_{wp}$ , and  $\chi^2$ ) of SGO: Bi<sup>3+</sup>, Mn<sup>4+</sup> phosphors.

| Formula        | SrGe <sub>4</sub> O <sub>9</sub> | SrGe <sub>3.995</sub> O <sub>9</sub> : 0.005Mn <sup>4+</sup> | Sr <sub>0.98</sub> Ge <sub>4</sub> O <sub>9</sub> : 0.02Bi <sup>3+</sup> | Sr <sub>0.98</sub> Ge <sub>3.995</sub> O <sub>9</sub> :<br>0.005Mn <sup>4+</sup> , 0.02Bi <sup>3+</sup> |
|----------------|----------------------------------|--------------------------------------------------------------|--------------------------------------------------------------------------|---------------------------------------------------------------------------------------------------------|
| Crystal system | trigonal                         |                                                              |                                                                          |                                                                                                         |
| Z              | 3                                |                                                              |                                                                          |                                                                                                         |
| Space-group    | <i>P 3 2 1</i> (150)             |                                                              |                                                                          |                                                                                                         |
| V              | 524.04(1)Å <sup>3</sup>          | 525.42(1) Å <sup>3</sup>                                     | 527.02(1) Å <sup>3</sup>                                                 | 527.79(1) Å <sup>3</sup>                                                                                |
| a              | 11.3021(1) Å                     | 11.3121(1) Å                                                 | 11.3240(1) Å                                                             | 11.3155(1) Å                                                                                            |
| c              | 4.7372(0) Å                      | 4.7412(0) Å                                                  | 4.7456(0) Å                                                              | 4.7417(1) Å                                                                                             |
| $\chi^2$       | 2.398                            | 1.950                                                        | 2.144                                                                    | 2.521                                                                                                   |
| $R_{wp}$       | 13.74%                           | 13.30%                                                       | 13.30%                                                                   | 13.36%                                                                                                  |
| $R_p$          | 8.95%                            | 9.03%                                                        | 9.63%                                                                    | 9.67%                                                                                                   |

Table S4. Atomic coordinates for SrGe<sub>4</sub>O<sub>9</sub>

| Atom | Wyckoff | x/a         | y/b         | z/c        |
|------|---------|-------------|-------------|------------|
| Sr1  | 3e      | 0.3325(5)   | 0           | 0          |
| Ge1  | 1a      | 0           | 0           | 0          |
| Ge2  | 2d      | 1/3         | 2/3         | 0.1138(9)  |
| Ge3  | 3f      | 0.8267(4)   | 0           | 1/2        |
| Ge4  | 6g      | 0.48733(20) | 0.33076(31) | 0.3988(4)  |
| O1   | 3f      | 0.5385(12)  | 0           | 1/2        |
| O2   | 6g      | 0.5892(8)   | 0.4217(8)   | 0.1215(18) |
| O3   | 6g      | 0.1458(8)   | 0.0465(10)  | 0.7753(21) |
| O4   | 6g      | 0.3388(9)   | 0.2265(7)   | 0.3038(16) |
| O5   | 6g      | 0.5035(6)   | 0.2557(7)   | 0.6568(16) |

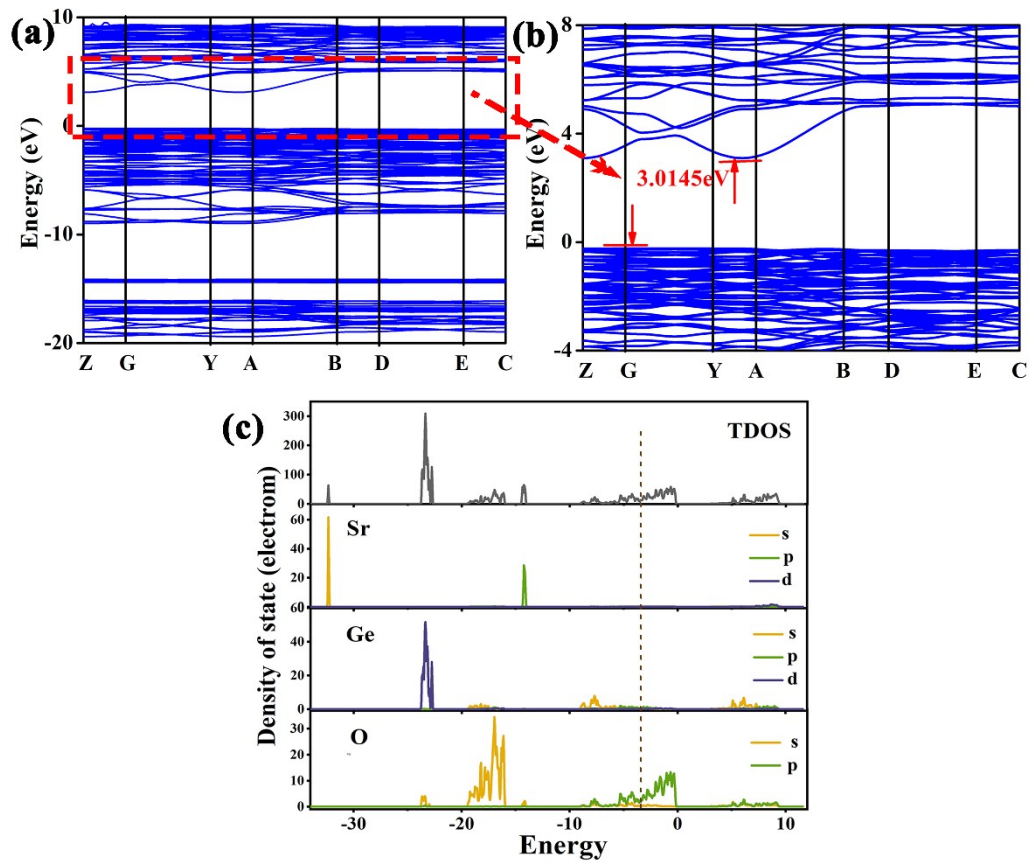

Figure. S2(a and b) Band structures of SGO; (c) Total and partial density of the states (DOS) for SGO

Figure. S2(a)(b) shows the band structure of SGO host obtained by refining the structure. The lowest point of the conduction band and the highest point of the valence band are not on the same position, indicating that SGO owns an indirect band gap and its energy is 3.0145 eV. Figure. S2(c) shows the total and separation density of SGO, which consists of s/p orbital of Sr, s/p/d orbital of Ge, and s/p orbital of O, forming the valence band from -35 eV to Fermi level. The conduction band of SGO consists of the d orbital of Sr, the s/p orbital of Ge, and the p orbital of O.
